# Supplementary material for: Messinvarianz zwischen Eltern- und Jugendversion des Strengths and Difficulties Questionnaire (SDQ)?
Source: Atypon-hosted journal article supplement (doi:10.1026/0012-1924/a000200), 2018-03-02
Supplement: 0012-1924_a000200_esm1.pdf [file 0012-1924_a000200_esm1.pdf]

*Elektronisches Supplement 1. Modellfitindizes Konfirmatorische Faktorenanalysen für Drei- und Vier-Faktoren-Modelle*

| Modell                                                                                | $\chi^2$ | <i>df</i> | CFI  | TLI  | RMSEA |
|---------------------------------------------------------------------------------------|----------|-----------|------|------|-------|
| <b>Drei-Faktoren-Modell</b>                                                           |          |           |      |      |       |
| Gesamt                                                                                | 8 090    | 184       | .785 | .854 | .068  |
| SDQ-Selbstbeurteilungsversion (Jugendliche)                                           | 2 843    | 185       | .825 | .862 | .056  |
| SDQ-Elternversion                                                                     | 4 345    | 163       | .813 | .889 | .074  |
| <b>Drei-Faktoren-Modell mit Doppelladungen</b>                                        |          |           |      |      |       |
| Gesamt                                                                                | 7 199    | 183       | .809 | .870 | .064  |
| SDQ-Selbstbeurteilungsversion (Jugendliche)                                           | 2 488    | 185       | .849 | .880 | .052  |
| SDQ-Elternversion                                                                     | 3 774    | 162       | .839 | .903 | .069  |
| <b>Drei-Faktoren-Modell mit korrelierten Fehlervarianzen</b>                          |          |           |      |      |       |
| Gesamt                                                                                | 5 495    | 182       | .856 | .901 | .056  |
| SDQ-Selbstbeurteilungsversion (Jugendliche)                                           | 2 143    | 182       | .871 | .896 | .048  |
| SDQ-Elternversion                                                                     | 3 432    | 162       | .854 | .913 | .066  |
| <b>Drei-Faktoren-Modell mit Doppelladungen &amp; korrelierten Fehlervarianzen</b>     |          |           |      |      |       |
| Gesamt                                                                                | 4 785    | 182       | .875 | .914 | .052  |
| SDQ-Selbstbeurteilungsversion (Jugendliche)                                           | 1 858    | 183       | .890 | .912 | .044  |
| SDQ-Elternversion                                                                     | 2 887    | 161       | .878 | .927 | .060  |
| <b>Vier-Faktoren-Modell</b>                                                           |          |           |      |      |       |
| Gesamt                                                                                | 6 786    | 185       | .821 | .879 | .062  |
| SDQ-Selbstbeurteilungsversion (Jugendliche)                                           | 2 502    | 184       | .848 | .879 | .052  |
| SDQ-Elternversion                                                                     | 3 396    | 165       | .856 | .915 | .065  |
| <b>Vier-Faktoren-Modell mit Doppelladungen</b>                                        |          |           |      |      |       |
| Gesamt                                                                                | 5 781    | 185       | .848 | .897 | .057  |
| SDQ-Selbstbeurteilungsversion (Jugendliche)                                           | 2 078    | 185       | .875 | .902 | .047  |
| SDQ-Elternversion                                                                     | 2 821    | 164       | .881 | .930 | .059  |
| <b>Vier-Faktoren-Modell mit korrelierten Fehlervarianzen</b>                          |          |           |      |      |       |
| Gesamt                                                                                | 4 651    | 182       | .879 | .917 | .051  |
| SDQ-Selbstbeurteilungsversion (Jugendliche)                                           | 1 950    | 182       | .884 | .907 | .046  |
| SDQ-Elternversion                                                                     | 2 711    | 163       | .886 | .932 | .058  |
| <b>Vier-Faktoren-Modell mit Doppelladungen &amp; mit korrelierten Fehlervarianzen</b> |          |           |      |      |       |
| Gesamt                                                                                | 4 035    | 182       | .895 | .928 | .048  |
| SDQ-Selbstbeurteilungsversion (Jugendliche)                                           | 1 638    | 183       | .904 | .924 | .041  |
| SDQ-Elternversion                                                                     | 2 281    | 162       | .905 | .943 | .053  |

*Anmerkungen:*  $N_{\text{Eltern}} = 4\ 648$ ;  $N_{\text{Jugendliche}} = 4\ 648$ . Parallelbefragung, Altersbereich 11–17 Jahre. *df* = der verwendete WLSMV Schätzer (ordinale Antwortskala) berechnet die Freiheitsgrade nicht in gewohnter Weise. Stattdessen werden die Freiheitsgrade geschätzt, um eine annähernde  $\chi^2$ -Verteilung zu erhalten (Muthén & Muthén, 2007). SDQ = Strengths and Difficulties Questionnaires.
