# Supplementary material for: Messinvarianz zwischen Eltern- und Jugendversion des Strengths and Difficulties Questionnaire (SDQ)?
Source: Atypon-hosted journal article supplement (doi:10.1026/0012-1924/a000200), 2018-03-02
Supplement: 0012-1924_a000200_esm2.pdf [file 0012-1924_a000200_esm2.pdf]

*Elektronisches Supplement 2.* Standardisierte Faktorenladungen für das partielle skalare Messinvarianzmodell

| Items                    | Faktoren-<br>Reliabilität<br>Eltern ( $\omega$ ) | Faktoren-<br>Ladungen<br>Eltern | Faktoren-Reliabilität<br>Jugendliche ( $\omega$ ) | Faktoren-<br>Ladungen<br>Jugendliche |
|--------------------------|--------------------------------------------------|---------------------------------|---------------------------------------------------|--------------------------------------|
| Emotionale<br>Probleme   | .75                                              |                                 | .74                                               |                                      |
| 3                        |                                                  | .393                            |                                                   | .492                                 |
| 8*                       |                                                  | .826                            |                                                   | .625                                 |
| 13                       |                                                  | .840                            |                                                   | .789                                 |
| 16                       |                                                  | .695                            |                                                   | .622                                 |
| 24                       |                                                  | .705                            |                                                   | .721                                 |
| Verhaltens-<br>probleme  | .62                                              |                                 | .59                                               |                                      |
| 5                        |                                                  | .591                            |                                                   | .598                                 |
| 7                        |                                                  | -.495                           |                                                   | -.494                                |
| 12*                      |                                                  | .627                            |                                                   | .480                                 |
| 18*                      |                                                  | .648                            |                                                   | .539                                 |
| 22                       |                                                  | .424                            |                                                   | .384                                 |
| Hyperaktivität           | .73                                              |                                 | .71                                               |                                      |
| 2*                       |                                                  | .669                            |                                                   | .577                                 |
| 10*                      |                                                  | .675                            |                                                   | .389                                 |
| 15                       |                                                  | .861                            |                                                   | .813                                 |
| 21                       |                                                  | -.636                           |                                                   | -.583                                |
| 25                       |                                                  | -.780                           |                                                   | -.683                                |
| Peerprobleme             | .69                                              |                                 | .69                                               |                                      |
| 6                        |                                                  | .593                            |                                                   | .514                                 |
| 11                       |                                                  | -.620                           |                                                   | -.685                                |
| 14*                      |                                                  | -.723                           |                                                   | -.559                                |
| 19                       |                                                  | .716                            |                                                   | .768                                 |
| 23                       |                                                  | .459                            |                                                   | .422                                 |
| Prosoziales<br>Verhalten | .71                                              |                                 | .71                                               |                                      |
| 1                        |                                                  | .775                            |                                                   | .811                                 |
| 4                        |                                                  | .526                            |                                                   | .499                                 |
| 9                        |                                                  | .614                            |                                                   | .605                                 |
| 17                       |                                                  | .551                            |                                                   | .544                                 |
| 20                       |                                                  | .576                            |                                                   | .612                                 |

*Anmerkungen:*  $N_{\text{Eltern}} = 4\,648$ ;  $N_{\text{Jugendliche}} = 4\,648$ . Parallelbefragung, Altersbereich 11–17 Jahre. Alle Faktorenladungen sind auf einem Niveau von  $p < .001$  signifikant. Faktorenreliabilitäten = McDonalds Omega ( $\omega$ ). \* Items mit frei geschätzten Faktorenladungen und Grenzwerten.
